# Supplementary material for: A comprehensive overview on antibody-drug conjugates: from the conceptualization to cancer therapy
Source: Front Pharmacol. 2023 Sep 18;14:1274088. doi: 10.3389/fphar.2023.1274088 (PMC10544916; doi:10.3389/fphar.2023.1274088)
Supplement: Supplementary file 1 [file Table1.XLS]

## Sheet: Supplementary table 1
NCT Number	Title	Conditions	Interventions	Phases
NCT03957915	Study of Escalating Doses of INA03 Administered Intravenously as Single Agent in Adult Patients With Relapse/Refractory Acute Leukemia	Acute Lymphoblastic Leukemia Recurrent|Acute Lymphoblastic Leukemia, in Relapse|Acute Myeloid Leukemia, in Relapse|Acute Myeloid Leukaemia Recurrent|Mixed Phenotype Acute Leukemia	Drug: INA03 administration	Early Phase 1
NCT05425550	Evaluation of the Medidux‚Ñ¢ Digital Health Application in Patients With HER2-positive Breast Cancer During Chemotherapy in Combination With HER2-targeted Therapy or Antibody-drug Conjugate Therapy.	Breast Cancer	Device: medidux‚Ñ¢ app	Not Applicable
NCT05831878	RC48-ADC in HER2-low Advanced Breast Cancer	Advanced Breast Cancer	Drug: Disitamab vedotin	Not Applicable
NCT05200364	A Study of STRO-002, an Anti-Folate Receptor Alpha Antibody Drug Conjugate, in Combination With Bevacizumab in Epithelial Ovarian Cancer	Ovarian Cancer|Ovarian Carcinoma|Ovary Cancer|Fallopian Tube Cancer|Primary Peritoneal Carcinoma	Drug: STRO-002|Drug: Bevacizumab	Phase 1
NCT05948865	A Phase 1 Study of CPO301 in Adult Patients With Advanced or Metastatic Solid Tumors	Cancer|Cancer, Lung	Drug: CPO301	Phase 1
NCT05652868	Clinical Study of Antibody-Drug Conjugate MYTX-011 in Subjects With Non-Small Cell Lung Cancer	NSCLC|NSCLC Stage IV|NSCLC Stage IIIB|Non-Small Cell Lung Cancer|Advanced Non-Small Cell Squamous Lung Cancer|Advanced Non-Small Cell Lung Cancer|Advanced Non-Small Cell Non-Squamous Lung Cancer	Drug: MYTX-011	Phase 1
NCT05527184	First in Human Study of IMGN151 in Recurrent Endometrial Cancer and Recurrent, High-grade Serous Epithelial Ovarian, Primary Peritoneal, or Fallopian Tube Cancers	Endometrial Cancer|High Grade Serous Adenocarcinoma of Ovary|Primary Peritoneal Carcinoma|Fallopian Tube Cancer	Drug: IMGN151	Phase 1
NCT03748186	Study of STRO-002, an Anti-Folate Receptor Alpha (FolRŒ±) Antibody Drug Conjugate in Ovarian & Endometrial Cancers	Ovarian Cancer|Ovarian Carcinoma|Ovary Cancer|Endometrial Cancer|Endometrioid Adenocarcinoma|Fallopian Tube Cancer|Primary Peritoneal Carcinoma	Drug: STRO-002	Phase 1
NCT05323045	A First-in-human Dose-escalation and Expansion Study With the Antibody-drug Conjugate BYON3521	Solid Tumor	Drug: BYON3521	Phase 1
NCT04450732	Safety of GQ1001 in Adult Patients With HER2-Positive Advanced Solid Tumors	HER2-positive Breast Cancer|HER2-positive Biliary Tract Cancer|HER2-Positive Salivary Gland Carcinomas|HER2-Positive Advanced Solid Tumor	Drug: GQ1001	Phase 1
NCT04064359	Safety and Preliminary Efficacy of OBT076 in Recurrent/Metastatic CD205+ Solid Tumors	Solid Tumor	Drug: OBT076, a CD205-directed antibody-drug conjugate	Phase 1
NCT05174637	A Study of FDA018-ADC in Patients With Advanced Solid Tumors	Advanced/ Metastatic Solid Tumors	Drug: FDA018-ADC	Phase 1
NCT05498597	AMT-151 in Patients With Selected Advanced Solid Tumours	Advanced Solid Tumor|Advanced Cancer|Advanced Carcinoma|Ovarian Cancer|Ovarian Carcinoma|Ovarian Epithelial Cancer|Ovarian Endometrioid Adenocarcinoma|Endometrial Cancer|Endometrial Adenocarcinoma|Endometrial Serous Adenocarcinoma|Endometrial Endometrioid Adenocarcinoma|Endometrial Clear Cell Adenocarcinoma|Lung Adenocarcinoma|Triple Negative Breast Cancer|Pancreatic Ductal Adenocarcinoma|Maligna…	Drug: AMT-151	Phase 1
NCT05464030	Anti-CEACAM5 ADC M9140 in Advanced Solid Tumors	Colorectal Cancer	Drug: M9140	Phase 1
NCT05980416	Study of EO-3021 in Adult Patients With Solid Tumors Likely to Express CLDN18.2	Pancreas Neoplasm|Stomach Neoplasm|Gastrointestinal Neoplasms|Digestive System Neoplasm|Neoplasms by Site|Neoplasms	Drug: EO-3021	Phase 1
NCT04042701	DS8201a and Pembrolizumab in Participants With Locally Advanced/Metastatic Breast or Non-Small Cell Lung Cancer	Breast Cancer|Non-small Cell Lung Carcinoma	Drug: Trastuzumab deruxtecan (DS-8201a)|Drug: Pembrolizumab	Phase 1
NCT04410224	Study of ASN004 in Patients With Advanced Solid Tumors	Solid Tumor	Drug: ASN004	Phase 1
NCT05547321	Efficacy and Safety Study of OMTX705, Monotherapy and Pembrolizumab-combined, in Subjects With Advanced Solid Tumors.	Advanced Solid Tumor	Drug: OMTX705|Drug: Pembrolizumab	Phase 1
NCT05867563	Clinical Trial Evaluating the Safety of the TQB2103 for Injection	Advanced Malignant Neoplasm	Drug: TQB2103 for injection	Phase 1
NCT05276609	ARTEMIS-001: Phase 1 Study of the HS-20093 in Patients With Advanced Solid Tumors	Advanced Solid Tumor	Drug: HS-20093 (Phase Ia: Dose escalation)|Drug: HS-20093 (Phase Ib: Dose expansion)	Phase 1
NCT05434234	A Study of YL201 in Patients With Advanced Solid Tumors	Advanced Solid Tumor	Drug: YL201	Phase 1
NCT05279300	A Study of CS5001 in Patients With Advanced Solid Tumors and Lymphomas	Advanced Solid Tumor|Advanced Lymphoma	Drug: CS5001	Phase 1
NCT05156866	First in Human Study of TORL-2-307-ADC in Participants With Advanced Cancer	Advanced Solid Tumor|Gastric Cancer|Pancreas Cancer|Gastroesophageal Junction Adenocarcinoma	Drug: TORL-2-307-ADC	Phase 1
NCT04617314	A Study of RC108-ADC in Subjects With Advanced Malignant Solid Tumors	Solid Tumor	Drug: RC108	Phase 1
NCT05245006	PET Imaging Study of 89Zr-DFO-YS5	Prostate Cancer|Metastatic Castration-resistant Prostate Cancer	Drug: 89Zr-DFO-YS5|Biological: YS5 antibody|Procedure: Positron Emission Tomography (PET)/Computerized tomography (CT)|Procedure: Positron Emission Tomography (PET)/Magnetic Resonance Imaging (MRI)	Phase 1
NCT05103683	First in Human Study of TORL-1-23 in Participants With Advanced Cancer	Advanced Solid Tumor|Ovarian Cancer|Endometrial Cancer|NSCLC	Drug: TORL-1-23	Phase 1
NCT05263479	A Study of HS-20089 in Patients With Advanced Solid Tumors	Advanced Solid Tumor	Drug: HS-20089 (Phase IaÔºöDose escalation )|Drug: HS-20089 (Phase Ib: Dose expansion)	Phase 1
NCT05372614	Testing the Safety and Tolerability of the Anti-cancer Drugs Trastuzumab Deruxtecan and Neratinib for Cancers With Changes in the HER2 Gene	Metastatic Malignant Solid Neoplasm|Unresectable Malignant Solid Neoplasm	Procedure: Biopsy|Drug: Neratinib Maleate|Biological: Trastuzumab Deruxtecan	Phase 1
NCT05866354	To Evaluate Pharmacokinetics of Tisotumab Vedotin in Chinese Subjects With Metastatic or Recurrent Solid Malignancies	Solid Malignancies	Drug: Tisotumab Vedotin	Phase 1
NCT04585958	Testing the Combination of DS-8201a and Olaparib in HER2-Expressing Cancers With Expansion in Patients With Endometrial Cancer	Endometrial Serous Adenocarcinoma|Metastatic Malignant Solid Neoplasm|Unresectable Malignant Solid Neoplasm	Procedure: Biopsy|Procedure: Biospecimen Collection|Procedure: Computed Tomography|Procedure: Echocardiography|Drug: Olaparib|Biological: Trastuzumab Deruxtecan	Phase 1
NCT05311397	A Study of A166 in Patients With Advanced Solid Malignant Tumors	Breast Cancer	Drug: A166	Phase 1
NCT05514158	To Evaluate the Safety, Tolerability, Pharmacokinetics and Preliminary Efficacy of Disitamab Vedotin Combined With RC98 in the Treatment of Subjects With HER2-expressing Locally Advanced or Metastatic Gastric Cancer (Including AEG)	Gastric Cancer	Drug: RC48-ADC|Drug: RC98	Phase 1
NCT05367635	A Study of SKB315 in Patients With Advanced Solid Tumors	Advanced Solid Tumors	Drug: SKB315 for injection	Phase 1
NCT04963153	Testing Combination Erdafitinib and Enfortumab Vedotin in Metastatic Bladder Cancer After Treatment With Chemotherapy and Immunotherapy	Locally Advanced Bladder Urothelial Carcinoma|Locally Advanced Renal Pelvis Urothelial Carcinoma|Locally Advanced Ureter Urothelial Carcinoma|Locally Advanced Urethral Urothelial Carcinoma|Locally Advanced Urothelial Carcinoma|Metastatic Bladder Urothelial Carcinoma|Metastatic Renal Pelvis Urothelial Carcinoma|Metastatic Ureter Urothelial Carcinoma|Metastatic Urethral Urothelial Carcinoma|Metasta…	Procedure: Biospecimen Collection|Procedure: Computed Tomography|Drug: Enfortumab Vedotin|Drug: Erdafitinib	Phase 1
NCT04941339	A Study of MRG002 in the Treatment of Patients With HER2-positive Advanced Solid Tumors	Advanced Solid Tumor	Drug: MRG002	Phase 1
NCT05293496	A Study of MGC018 in Combination With MGD019 in Participants With Advanced Solid Tumors	Advanced Solid Tumor|Castration-Resistant Prostatic Cancer|Malignant Melanoma|Pancreatic Ductal Carcinoma|Hepatocellular Cancer|Epithelial Ovarian Cancer|Renal Cell Carcinoma	Biological: vobramitamab duocarmazine|Biological: lorigerlimab	Phase 1
NCT05647122	First in Human Study of AZD9592 in Solid Tumors	Advanced Solid Tumours|Carcinoma Non-small Cell Lung|Head and Neck Neoplasms	Drug: AZD9592|Drug: Osimertinib	Phase 1
NCT05868226	PRE-I-SPY Phase I/Ib Oncology Platform Program	HER2-positive Breast Cancer|Metastatic Cancer|Metastatic Breast Cancer|Metastatic|HER2-positive Metastatic Breast Cancer|HER2 Mutation-Related Tumors|HER-2 Protein Overexpression|HER2-negative Breast Cancer|Triple Negative Breast Cancer|HR Positive|Hormone Receptor-positive Breast Cancer|Estrogen Receptor Positive Tumor|Progesterone Receptor-positive Breast Cancer|Hormone Receptor Negative Breast…	Drug: ALX148|Drug: Fam-Trastuzumab Deruxtecan-Nxki	Phase 1
NCT05701527	A Study of EBC-129 in Advanced Solid Tumours	Advanced Solid Tumours	Drug: EBC-129|Drug: Pembrolizumab	Phase 1
NCT04617522	Study of Sacituzumab Govitecan in Participants With Advanced or Metastatic Solid Tumor and Moderate Liver Impairment	Advanced or Metastatic Solid Tumor|Liver Failure	Drug: Sacituzumab Govitecan-hziy	Phase 1
NCT05720117	Study of PYX-201 in Solid Tumors	Solid Tumor|Advanced Solid Tumor	Drug: PYX-201	Phase 1
NCT05143229	Alpelisib And Sacituzumab Govitecan For Treatment Of Breast Cancer	Breast Cancer	Drug: Alpelisib|Drug: Sacituzumab govitecan	Phase 1
NCT05773937	A Clinical Study of 9MW2821 in Advanced Malignant Solid Tumors	Advanced Malignant Solid Tumors	Drug: 9MW2821	Phase 1
NCT04925284	Study of XB002 in Subjects With Solid Tumors (JEWEL-101)	Non Small Cell Lung Cancer|Cervical Cancer|SCCHN|Pancreatic Cancer|Esophageal SCC|Metastatic Castration-resistant Prostate Cancer|Triple Negative Breast Cancer|Hormone Receptor-positive Breast Cancer|Epithelial Ovarian Cancer|Endometrial Cancer|Tissue Factor-Expressing Solid Tumors	Drug: XB002|Drug: Nivolumab|Drug: Bevacizumab	Phase 1
NCT04398745	A Study of Belantamab Mafodotin Monotherapy in Multiple Myeloma Participants With Normal and Varying Degree of Impaired Renal Function	Multiple Myeloma	Drug: Belantamab mafodotin	Phase 1
NCT05511844	Study of ORM-5029 in Subjects With HER2-Expressing Advanced Solid Tumors	HER2-positive Breast Cancer|HER-2 Protein Overexpression|HER-2 Gene Amplification|HER2 Gene Mutation	Drug: ORM-5029	Phase 1
NCT04878029	Cabozantinib in Combination With Enfortumab Vedotin for Locally Advanced or Metastatic Urothelial Cancer	Infiltrating Bladder Urothelial Carcinoma With Squamous Differentiation|Locally Advanced Urothelial Carcinoma|Metastatic Urothelial Carcinoma|Unresectable Urothelial Carcinoma	Drug: Cabozantinib S-malate|Drug: Enfortumab Vedotin|Other: Quality-of-Life Assessment|Other: Questionnaire Administration	Phase 1
NCT05155839	Safety and Preliminary Efficacy Study of MRG001 in Patients With Non-Hodgkin Lymphoma (NHL)	Relapsed or Refractory B-cell Non-Hodgkin Lymphoma (NHL)	Drug: MRG001	Phase 1
NCT04231877	Polatuzumab Vedotin and Combination Chemotherapy for the Treatment of Untreated Aggressive Large B-cell Lymphoma	Aggressive Non-Hodgkin Lymphoma|ALK-Positive Large B-Cell Lymphoma|B-Cell Lymphoma, Unclassifiable, With Features Intermediate Between Diffuse Large B-Cell Lymphoma and Classic Hodgkin Lymphoma|Diffuse Large B-Cell Lymphoma, Not Otherwise Specified|EBV-Positive Diffuse Large B-Cell Lymphoma, Not Otherwise Specified|High Grade B-Cell Lymphoma With MYC and BCL2 and/or BCL6 Rearrangements|High Grade…	Drug: Polatuzumab Vedotin|Biological: Rituximab|Drug: Prednisone|Drug: Etoposide|Drug: Doxorubicin|Drug: Cyclophosphamide|Biological: Filgrastim	Phase 1
NCT04039230	Study to Evaluate Sacituzumab Govitecan in Combination With Talazoparib in Patients With Metastatic Breast Cancer.	Breast Cancer	Drug: Talazoparib|Drug: Sacituzumab Govitecan	Phase 1|Phase 2
NCT04622774	First-in-Human Study of IMGC936 in Patients With Advanced Solid Tumors	Advanced Solid Tumor	Drug: IMGC936	Phase 1|Phase 2
NCT04300556	A Study to Evaluate the Safety, Tolerability, and Efficacy of MORAb-202 (Herein Referred to as Farletuzumab Ecteribulin), a Folate Receptor Alpha (FRŒ±)-Targeting Antibody-drug Conjugate (ADC) in Participants With Selected Tumor Types	Solid Tumor	Drug: Farletuzumab ecteribulin	Phase 1|Phase 2
NCT04982224	Study of REGN5093-M114 (METxMET Antibody-Drug Conjugate) in Adult Patients With Mesenchymal Epithelial Transition Factor (MET) Overexpressing Advanced Cancer	Advanced NSCLC	Drug: REGN5093-M114	Phase 1|Phase 2
NCT05123482	First in Human Study to Evaluate AZD8205 in Patients With Advanced or Metastatic Solid Malignancies	Breast Cancer|Biliary Tract Carcinoma|Ovarian Cancer|Endometrial Cancer	Drug: AZD8205	Phase 1|Phase 2
NCT05797168	Phase I/IIa Study for AZD5335 as Monotherapy and in Combination With Anti-cancer Agents in Participants With Solid Tumors	Ovarian Cancer|Lung Adenocarcinoma	Drug: AZD5335|Drug: AZD5305	Phase 1|Phase 2
NCT05525286	Clinical Trial of SOT102 Antibody Drug Conjugate in Patients With Advanced Gastric and Pancreatic Adenocarcinoma	Gastric Cancer|Pancreatic Cancer|Gastro-Esophageal Junction Cancer	Drug: SOT102	Phase 1|Phase 2
NCT04084366	Phase 1/2 Study of OBI-999 in Patients With Advanced Solid Tumors	Locally Advanced Solid Tumor	Drug: OBI-999	Phase 1|Phase 2
NCT04802759	A Study Evaluating the Efficacy and Safety of Multiple Treatment Combinations in Participants With Breast Cancer	Inoperable, Locally Advanced or Metastatic, ER-positive Breast Cancer	Drug: Giredestrant|Drug: Abemaciclib|Drug: Ipatasertib|Drug: Inavolisib|Drug: Ribociclib|Drug: Everolimus|Drug: Samuraciclib|Drug: PH FDC SC|Drug: Palbociclib|Drug: Atezolizumab	Phase 1|Phase 2
NCT03319628	First-in-Human Study of XMT-1536 in Cancers Likely to Express NaPi2b	Platinum Resistant Ovarian Cancer|Non Small Cell Lung Cancer Metastatic	Drug: upifitamab rilsodotin	Phase 1|Phase 2
NCT05011188	FOR46 in Combination With Enzalutamide in Patients With Metastatic Castration Resistant Prostate Cancer	Metastatic Castration-resistant Prostate Cancer|Prostate Cancer	Biological: FOR46|Biological: Enzalutamide|Drug: Pegfilgrastim	Phase 1|Phase 2
NCT05875168	First-in-Human Study of DS-3939a in Participants With Advanced Solid Tumors	Advanced Solid Tumor|Metastatic Solid Tumor	Drug: DS-3939a	Phase 1|Phase 2
NCT05205850	A Study of RC118 in Patients With Locally Advanced Unresectable or Metastatic Malignant Solid Tumors	Advanced Solid Tumor	Drug: RC118-ADC	Phase 1|Phase 2
NCT05611853	Study of BN301, an Anti-CD74 Antibody Drug Conjugate, in Patients With Advanced B-Cell Malignancies	B-cell Lymphoma|Non Hodgkin Lymphoma|Diffuse Large B Cell Lymphoma|Follicular Lymphoma|Mantle Cell Lymphoma	Drug: BN301	Phase 1|Phase 2
NCT05320588	A Study in Patients With Advanced Cancers	Advanced Cancer|Advanced Solid Tumor|Cancer|Oncology	Drug: BIO-106|Drug: Pembrolizumab	Phase 1|Phase 2
NCT04126200	Platform Study of Belantamab Mafodotin as Monotherapy and in Combination With Anti-cancer Treatments in Participants With Relapsed/Refractory Multiple Myeloma (RRMM) (DREAMM 5)	Multiple Myeloma	Drug: Belantamab mafodotin|Drug: GSK3174998|Drug: Feladilimab|Drug: Nirogacestat|Drug: Dostarlimab|Drug: Isatuximab|Drug: Lenalidomide|Drug: Dexamethasone|Drug: Pomalidomide	Phase 1|Phase 2
NCT05565807	Safety and Efficacy Study of An Anti-CD38 Antibody Drug Conjugate in Relapsed or Refractory Multiple Myeloma	Relapsed or Refractory Multiple Myeloma	Biological: STI-6129	Phase 1|Phase 2
NCT03504488	CAB-ROR2-ADC Safety and Efficacy Study in Patients With TNBC or Head & Neck Cancer (Ph1) and NSCLC or Melanoma (Ph2)	Non Small Cell Lung Cancer|Triple Negative Breast Cancer|Melanoma|Head and Neck Cancer	Biological: CAB-ROR2-ADC|Biological: PD-1 inhibitor	Phase 1|Phase 2
NCT04152499	Phase I-II, FIH, TROP2 ADC, Advanced Unresectable/Metastatic Solid Tumors, Refractory to Standard Therapies	Epithelial Ovarian Cancer|Gastric Adenocarcinoma|Gastroesophageal Junction Adenocarcinoma|Urothelial Carcinoma|Non-Small Cell Lung Cancer|Small-Cell Lung Cancer|Endometrial Carcinoma|Head and Neck Squamous Cell Carcinoma|Breast Cancer	Drug: SKB264	Phase 1|Phase 2
NCT04843709	A Study of MRG004A in Patients With Tissue Factor Positive Advanced or Metastatic Solid Tumors	Advanced or Metastatic Solid Tumors	Drug: MRG004A	Phase 1|Phase 2
NCT04492488	A Study of MRG002 in Patients With HER2-Positive Advanced Solid Tumors and Locally Advanced or Metastatic Gastric/Gastroesophageal Junction (GEJ) Cancer	Advanced Solid Tumors|Advanced or Metastatic Gastric Cancer|Advanced or Metastatic Gastroesophageal Junction Cancer	Drug: MRG002	Phase 1|Phase 2
NCT05688605	A Study of MRG003 in the Treatment of Patients With EGFR-positive Advanced or Metastatic Solid Tumors	Advanced Solid Tumors	Drug: MRG003+HX008	Phase 1|Phase 2
NCT04826341	A Phase I/II Study of Sacituzumab Govitecan Plus Berzosertib in Small Cell Lung Cancer, Extra-Pulmonary Small Cell Neuroendocrine Cancer and Homologous Recombination-Deficient Cancers Resistant to PARP Inhibitors	HRD Cancer|SCLC|Advanced Solid Tumors	Drug: Berzosertib|Drug: Sacituzumab Govitecan	Phase 1|Phase 2
NCT04822337	Study of Carfilzomib, Lenalidomide, Dexamethasone and Belantamab Mafodotin in Multiple Myeloma	Multiple Myeloma	Drug: Carfilzomib, Lenalidomide, Dexamethasone, Belantamab Mafodotin	Phase 1|Phase 2
NCT04662580	ARX517 in Subjects With Metastatic Castration-resistant Prostate Cancer	Prostate Cancer	Drug: ARX517	Phase 1|Phase 2
NCT05338957	A Study of MRG002 in the Treatment of Patients With HER2-expressed Advanced Malignant Solid Tumors.	Advanced Malignant Solid Tumors	Drug: MRG002+HX008	Phase 1|Phase 2
NCT05216965	A Clinical Study of 9MW2821 in Subjects With Advanced Malignant Solid Tumors	Solid Tumors	Drug: 9MW2821	Phase 1|Phase 2
NCT04644068	Study of AZD5305 as Monotherapy and in Combination With Anti-cancer Agents in Patients With Advanced Solid Malignancies	Ovarian Cancer|Breast Cancer|Pancreatic Cancer|Prostate Cancer|Additional Indications Below for Module 4 and 5|Non-small Cell Lung Cancer|Small Cell Lung Cancer|Colorectal Cancer|Bladder Cancer|Gastric Cancer|Biliary Cancer|Cervical Cancer|Endometrial Cancer	Drug: AZD5305|Drug: Paclitaxel|Drug: Carboplatin|Drug: T- Dxd|Drug: Dato-DXd|Drug: Camizestrant	Phase 1|Phase 2
NCT03425279	Phase 2 CAB-AXL-ADC Safety and Efficacy Study in Adult and Adolescent Patients With Sarcoma	Undifferentiated Pleomorphic Sarcoma|Liposarcoma|Synovial Sarcoma|Osteosarcoma|Ewing Sarcoma	Biological: CAB-AXL-ADC|Biological: PD-1 inhibitor	Phase 1|Phase 2
NCT05579366	PRO1184 for Advanced Solid Tumors	Ovarian Cancer|Primary Peritoneal Carcinoma|Fallopian Tube Cancer|Endometrial Cancer|Non-small Cell Lung Cancer|Mesothelioma|Triple Negative Breast Cancer|HER2-negative Breast Cancer|Hormone Receptor-positive Breast Cancer	Drug: PRO1184	Phase 1|Phase 2
NCT04175847	A Phase I /IIa Study of RC88-ADC in Subjects With Advanced Malignant Solid Tumors	Solid Tumor	Drug: RC88	Phase 1|Phase 2
NCT05582499	Fudan University Shanghai Cancer Center Breast Cancer Precision Platform Series Study- Neoadjuvant Therapy	Breast Neoplasm|Breast Cancer|Breast Tumors|Triple-Negative Breast Cancer (TNBC)|HER2-positive Breast Cancer|HER2-negative Breast Cancer|Hormone Receptor Positive Tumor|Hormone Receptor Negative Tumor|Early-stage Breast Cancer|Locally Advanced Breast Cancer	Drug: Dalpiciclib|Drug: Pyrotinib|Drug: SHR-A1811|Drug: SHR-1316|Drug: Camrelizumab|Drug: Trophoblast cell-surface antigen 2 (TROP2) ADC|Drug: Pertuzumab|Drug: Trastuzumab|Drug: Goserelin|Drug: Letrozole|Drug: Nab paclitaxel|Drug: Carboplatin|Drug: Epirubicin|Drug: Cyclophosphamide|Drug: Fluzoparib|Drug: HER2 ADC	Phase 1|Phase 2
NCT04316442	Study of the Safety and Efficacy of STI-6129 in Patients With Relapsed or Refractory Systemic AL Amyloidosis	Light Chain (AL) Amyloidosis	Biological: STI-6129	Phase 1|Phase 2
NCT05535244	A Study Evaluating the Efficacy and Safety of Cevostamab in Prior B Cell Maturation Antigen (BCMA)-Exposed Participants With Relapsed/Refractory Multiple Myeloma	Multiple Myeloma	Drug: Cevostamab|Drug: Tocilizumab	Phase 1|Phase 2
NCT04983121	Efficacy and Safety of Pyrotinib Maleate Combined With ARX788 Neoadjuvant Treatment in Breast Cancer Patients	Breast Neoplasms	Drug: Next-generation Site-specific human epidermal growth factor receptor 2 (HER2)-targeting Antibody-drug Conjugate (ARX788)	Phase 2
NCT04829604	ARX788 in HER2-positive, Metastatic Breast Cancer Subjects (ACE-Breast-03)	HER2 Positive Metastatic Breast Cancer	Drug: ARX788	Phase 2
NCT04965766	Patritumab Deruxtecan (U3-1402) in Unresectable Locally Advanced or Metastatic Breast Cancer	Metastatic Breast Cancer	Drug: U3-1402	Phase 2
NCT04940325	Datopotamab (DS-1062a) in Advanced and/or Unresectable Non-Small Cell Lung Cancer	Metastatic Lung Cancer	Drug: DS-1062a	Phase 2
NCT05613088	A Study of MORAb-202 Versus Investigator's Choice Chemotherapy in Female Participants With Platinum-resistant High-grade Serous (HGS) Ovarian, Primary Peritoneal, or Fallopian Tube Cancer	Neoplasms, Ovarian	Drug: MORAb-202|Drug: Paclitaxel|Drug: Pegylated Liposomal Doxorubicin (PLD)|Drug: Topotecan	Phase 2
NCT05838521	A Study of Sacituzumab Govitecan (IMMU-132) in Patients With Recurrent or Persistent Cervical Cancer	Cervical Cancer	Drug: Sacituzumab govitecan	Phase 2
NCT05456685	IMGN853 With Carboplatin in Second-line Treatment of FRŒ± Expressing, Platinum-sensitive Epithelial Ovarian Cancer	High Grade Ovarian Cancer|Primary Peritoneal Cancer|Fallopian Tube Cancer	Drug: Mirvetuximab soravtansine|Drug: Carboplatin	Phase 2
NCT04699630	A Study of U3-1402 in Subjects With Metastatic Breast Cancer	Metastatic Breast Cancer|Locally Advanced Breast Cancer	Drug: U3-1402	Phase 2
NCT05601401	Phase II Study of RC48-ADC in Treating Patients With Salivary Gland Tumors Expressing HER2	Salivary Gland Tumors	Drug: RC48-ADC	Phase 2
NCT03725761	Sacituzumab Govitecan in Patients With Metastatic Castration-Resistant Prostate Cancer Progressing on Second Generation AR-Directed Therapy	Prostate Cancer	Drug: Sacituzumab Govitecan	Phase 2
NCT04329429	A Study of RC48-ADC in Subjects With HER2 Overexpressed Metastatic Biliary Tract Cancer	Biliary Tract Cancer	Drug: RC48-ADC	Phase 2
NCT05577715	A Study of MORAb-202 in Participants With Previously Treated Metastatic Non-Small Cell Lung Cancer (NSCLC) Adenocarcinoma (AC)	Carcinoma, Non-Small-Cell Lung	Drug: MORAb-202	Phase 2
NCT05870748	REFRaME-O1: A Study to Investigate the Efficacy and Safety of Luveltamab Tazevibulin in Women With Ovarian Cancer (Including Fallopian Tube or Primary Peritoneal Cancers) Expressing FOLR1	Ovarian Cancer|Epithelial Ovarian Cancer|Fallopian Tube Cancer|Primary Peritoneal Cancer|Platinum-resistant Ovarian Cancer	Drug: Luveltamab tazevibulin|Drug: Pegfilgrastim	Phase 2
NCT03835819	A Phase 2 Study of Mirvetuximab Soravtansine (IMGN853) and Pembrolizumab in Endometrial Cancer (EC)	Endometrial Cancer	Drug: Pembrolizumab|Drug: IMGN853	Phase 2
NCT05263869	A Study of MRG002 in Treatment of Advanced HER-2 Positive Breast Cancer Patients	Breast Cancer With Liver Metastases	Drug: MRG002	Phase 2
NCT04681131	CAB-AXL-ADC Safety and Efficacy Study in Adults With NSCLC	Non-Small-Cell Lung Cancer	Biological: CAB-AXL-ADC|Biological: PD-1 inhibitor	Phase 2
NCT05493683	Disitamab Vedotin Combined With Tislelizumab in Advanced HER2 Positive Colorectal Cancer	Colorectal Neoplasms	Drug: Disitamab vedotin|Drug: Tislelizumab	Phase 2
NCT04742153	A Study of MRG002 in the Treatment of Patients With HER2-low Locally Advanced or Metastatic Breast Cancer (BC)	Advanced or Metastatic Breast Cancer	Drug: MRG002	Phase 2
NCT05141747	A Study of MRG002 in the Treatment of HER2-positive/HER2-low Locally Advanced or Metastatic Gastric/Gastroesophageal Junction Cancer.	Locally Advanced Gastric Cancer|Metastatic HER2 Positive Gastroesophageal Junction Cancer	Drug: MRG002	Phase 2
NCT02448420	Study of Palbociclib and Trastuzumab With Endocrine Therapy in HER2-positive Metastatic Breast Cancer	Metastatic Breast Cancer	Drug: Palbociclib|Drug: Trastuzumab|Drug: Endocrine therapy|Drug: Chemotherapy|Drug: Antibody-Drug Conjugates	Phase 2
NCT04838964	A Study of MRG003 in the Treatment of EGFR-positive Unresectable, Locally Advanced or Metastatic Biliary Tract Cancer	Advanced or Metastatic Biliary Tract Cancer	Drug: MRG003	Phase 2
NCT04837508	A Study of MRG002 in the Treatment of HER2-positive Unresectable, Locally Advanced or Metastatic Biliary Tract Cancer	Advanced or Metastatic Biliary Tract Cancer	Drug: MRG002	Phase 2
NCT05887609	An Evaluation of Maintenance Therapy Combination Mirvetuximab Soravtansine and Olaparib	Ovary Cancer|Peritoneal Cancer|Fallopian Tube Cancer	Drug: Mirvetuximab Soravtansine|Drug: Olaparib	Phase 2
NCT05188209	A Study to Evaluate the Efficacy and Safety of MRG003 in Patients With Advanced Gastric Cancer.	Advanced or Metastatic Gastric Cancer|Advanced or Metastatic Gastroesophageal Junction Carcinoma	Drug: MRG003	Phase 2
NCT04839510	A Study of MRG002 in the Treatment of HER2-positive Unresectable Locally Advanced or Metastatic Urothelium Cancer	Locally Advanced Urothelial Cancer|Metastatic Urothelial Carcinoma	Drug: MRG002	Phase 2
NCT05489211	Study of Dato-Dxd as Monotherapy and in Combination With Anti-cancer Agents in Patients With Advanced Solid Tumours (TROPION-PanTumor03)	Endometrial Cancer|Gastric Cancer|Metastatic Castration-resistant Prostate Cancer|Ovarian Cancer|Colorectal Cancer|Urothelial Cancer|Biliary Tract Cancer	Drug: Datopotamab deruxtecan (Dato-DXd)|Drug: AZD5305|Drug: Durvalumab|Drug: Capecitabine|Drug: 5-Fluorouracil|Drug: Volrustomig|Drug: Carboplatin|Drug: Leucovorin LV|Drug: Bevacizumab|Drug: Rilvegostomig|Drug: Prednisone/ prednisolone	Phase 2
NCT04647916	Testing Sacituzumab Govitecan Therapy in Patients With HER2-Negative Breast Cancer and Brain Metastases	Anatomic Stage IV Breast Cancer AJCC v8|Invasive Breast Carcinoma|Metastatic HER2 Negative Breast Carcinoma|Metastatic Malignant Neoplasm in the Brain|Prognostic Stage IV Breast Cancer AJCC v8	Biological: Sacituzumab Govitecan	Phase 2
NCT04251416	A Study of Sacituzumab Govitecan (IMMU-132) in Endometrial Carcinoma	Endometrial Carcinoma	Drug: Sacituzumab Govitecan	Phase 2
NCT05271604	A Phase 2 Open Label Study of BA3021 in Patients With Recurrent or Metastatic Squamous Cell Carcinoma of the Head and Neck	Head and Neck Cancer|Squamous Cell Carcinoma of Head and Neck|Recurrent Squamous Cell Carcinoma of the Head and Neck|Metastatic Cancer|Metastatic Squamous Cell Carcinoma of the Head and Neck	Biological: Ozuriftamab Vedotin|Biological: PD-1 inhibitor	Phase 2
NCT05581589	Sacituzumab Govitecan Before Radical Cystectomy for the Treatment of Non-Urothelial Muscle Invasive Bladder Cancer	Muscle Invasive Bladder Carcinoma|Stage II Bladder Cancer AJCC v8|Stage IIIA Bladder Cancer AJCC v8	Procedure: Lymphadenectomy|Procedure: Radical Cystectomy|Biological: Sacituzumab Govitecan	Phase 2
NCT05979740	RC48 Combined With Toripalimab and Radiotherapy for Bladder Sparing Treatment in MIBC	Muscle Invasive Bladder Cancer|HER2 Expression|Radiotherapy|PD-1|Antibody-drug Conjugates	Drug: Disitamab Vedotin and Toripalimab	Phase 2
NCT04680468	Study of Belantamab Mafodotin as Pre- and Post-autologous Stem Cell Transplant and Maintenance for Multiple Myeloma	Myeloma	Drug: Belantamab mafodotin	Phase 2
NCT03374332	Fractionated Gemtuzumab Ozogamicin Followed by Non-engraftment Donor Leukocyte Infusions for Relapsed/Refractory Acute Myeloid Leukemia	Acute Myeloid Leukemia	Drug: Gemtuzumab Ozogamicin (GO)|Other: Donor Leukocytes	Phase 2
NCT05408845	Testing the Use of Ado-Trastuzumab Emtansine Compared to the Usual Treatment (Chemotherapy With Docetaxel Plus Trastuzumab) for Recurrent, Metastatic, or Unresectable HER2-Positive Salivary Gland Cancer	Metastatic Salivary Gland Carcinoma|Recurrent Salivary Gland Carcinoma|Stage III Major Salivary Gland Cancer AJCC v8|Stage IV Major Salivary Gland Cancer AJCC v8|Unresectable Salivary Gland Carcinoma	Drug: Docetaxel|Other: Questionnaire Administration|Biological: Trastuzumab|Biological: Trastuzumab Emtansine	Phase 2
NCT05830123	ARTEMIS-002: HS-20093 in Patients With Relapsed or Refractory Osteosarcoma and Other Sarcomas	Osteosarcoma|Sarcoma	Drug: HS-20093	Phase 2
NCT04197687	TPIV100 and Sargramostim for the Treatment of HER2 Positive, Stage II-III Breast Cancer in Patients With Residual Disease After Chemotherapy and Surgery	Breast Adenocarcinoma|Stage II Breast Cancer AJCC v6 and v7|Stage IIA Breast Cancer AJCC v6 and v7|Stage IIB Breast Cancer AJCC v6 and v7|Stage III Breast Cancer AJCC v7|Stage IIIA Breast Cancer AJCC v7|Stage IIIB Breast Cancer AJCC v7|Stage IIIC Breast Cancer AJCC v7	Biological: Multi-epitope HER2 Peptide Vaccine TPIV100|Biological: Pertuzumab|Other: Placebo Administration|Biological: Sargramostim|Biological: Trastuzumab|Biological: Trastuzumab Emtansine	Phase 2
NCT05798156	Rituximab in Combination With Glofitamab and Polatuzumab Vedotin in Patients With Previously Untreated Aggressive Large B-cell Lymphoma Ineligible for R-CHOP	Lymphoma, Large B-Cell, Diffuse	Drug: Glofitamab|Drug: Rituximab|Drug: Obinutuzumab|Drug: Polatuzumab vedotin	Phase 2
NCT05599360	Vyxeos for Induction of Low- or Intermediate-risk.	Leukemia, Myeloid, Acute	Drug: Vyxeos|Drug: Mylotarg	Phase 2
NCT05064358	Study to Investigate Alternative Dosing Regimens of Belantamab Mafodotin in Participants With Relapsed or Refractory Multiple Myeloma	Multiple Myeloma	Drug: Belantamab mafodotin	Phase 2
NCT01703949	Brentuximab Vedotin With or Without Nivolumab in Treating Patients With Relapsed or Refractory CD30+ Lymphoma	Recurrent Hodgkin Lymphoma|Recurrent Non-Hodgkin Lymphoma|Refractory Hodgkin Lymphoma|Refractory Non-Hodgkin Lymphoma	Drug: Brentuximab Vedotin|Other: Laboratory Biomarker Analysis|Biological: Nivolumab	Phase 2
NCT03007030	Brentuximab Vedotin in Treating Patients With CD30+ Malignant Mesothelioma That Cannot Be Removed by Surgery	CD30-Positive Neoplastic Cells Present|Malignant Mesothelioma	Drug: Brentuximab Vedotin|Other: Laboratory Biomarker Analysis	Phase 2
NCT05410418	Mosunetuzumab and Polatuzumab Vedotin for Untreated Follicular Lymphoma	Lymphoma, Follicular|Follicular Lymphoma	Drug: Mosunetuzumab|Drug: Polatuzumab vedotin	Phase 2
NCT03913559	Inotuzumab Ozogamicin for Children With MRD Positive CD22+ Lymphoblastic Leukemia	Acute Lymphoblastic Leukemia	Drug: Inotuzumab ozogamicin|Drug: Methotrexate|Drug: Hydrocortisone|Drug: Cytarabine|Drug: Diphenhydramine|Drug: Acetaminophen|Drug: Methylprednisolone	Phase 2
NCT04676360	Belantamab Mafodotin In Plasmablastic Lymphoma & ALK+ Large B-Cell Lymphoma	Relapsed Plasmablastic Lymphoma|Refractory Plasmablastic Lymphoma|Anaplastic Lymphoma Kinase Positive Large B-Cell Lymphoma	Drug: Belantamab Mafodotin	Phase 2
NCT05498220	Polatuzumab Vedotin With R-GDP in Relapsed/Refractory Diffuse Large B-cell Lymphoma	Diffuse Large B-cell Lymphoma	Drug: Polatuzumab vedotin (PV)|Drug: Rituximab|Drug: Hyaluronidase|Drug: Gemcitabine|Drug: Cisplatin|Drug: Dexamethasone|Drug: GCSF	Phase 2
NCT05327530	A Study of the Safety and Efficacy of Various Combinations of Avelumab as Therapy in Locally Advanced or Metastatic Urothelial Carcinoma (JAVELIN Bladder Medley)	Locally Advanced or Metastatic Urothelial Carcinoma	Drug: Avelumab|Drug: Sacituzumab Govitecan|Drug: M6223|Drug: NKTR-255	Phase 2
NCT04266249	CompassHER2-pCR: Decreasing Chemotherapy for Breast Cancer Patients After Pre-surgery Chemo and Targeted Therapy	Anatomic Stage II Breast Cancer AJCC v8|Anatomic Stage IIA Breast Cancer AJCC v8|Anatomic Stage IIB Breast Cancer AJCC v8|Anatomic Stage IIIA Breast Cancer AJCC v8|Invasive Breast Carcinoma|Prognostic Stage II Breast Cancer AJCC v8|Prognostic Stage IIA Breast Cancer AJCC v8|Prognostic Stage IIB Breast Cancer AJCC v8|Prognostic Stage IIIA Breast Cancer AJCC v8	Drug: Docetaxel|Procedure: Lumpectomy|Procedure: Mastectomy|Drug: Nab-paclitaxel|Drug: Paclitaxel|Biological: Pertuzumab|Radiation: Radiation Therapy|Biological: Trastuzumab|Biological: Trastuzumab Emtansine	Phase 2
NCT02588651	A Phase II Study of Single Agent Brentuximab Vedotin in Relapsed/Refractory CD30 Low (<10%) Mature T Cell Lymphoma (TCL)	T-cell Lymphoma|Angioimmunoblastic T-cell Lymphoma|Hepato-splenic T-cell Lymphoma|Adult T-cell Leukemia/Lymphoma|Enteropathy Associated T-cell Lymphoma|NK T-cell Lymphoma	Drug: Brentuximab vedotin	Phase 2
NCT04378647	BREntuximab Vedotin in SEcond LIne Therapy BEfore Transplant	Hodgkin Lymphoma, Adult	Drug: Induction with Brentuximab vedotin (BV)|Drug: Induction without Brentuximab Vedotin|Drug: Consolidation with Brentuximab Vedotin	Phase 2
NCT05126719	A Study to Evaluate the Efficacy and Safety of MRG003 in Patients With Recurrent Metastatic Nasopharyngeal Carcinoma	Recurrent or Metastatic Nasopharyngeal Carcinoma	Drug: MRG003|Drug: Capecitabine tablets|Drug: Docetaxel injection	Phase 2
NCT04868162	A Study to Evaluate the Efficacy and Safety of MRG003 in Patients With Recurrent or Metastatic Squamous Cell Carcinoma of Head and Neck	Recurrent or Metastatic Squamous Cell Carcinoma of Head and Neck	Drug: MRG003	Phase 2
NCT05748171	A Study to Learn More About the Study Medicine Called Inotuzumab Ozogamicin (InO) in Children (1 to <18 Years) With First Relapse ALL	ACUTE LYMPHOBLASTIC LEUKEMIA	Drug: Inotuzumab ozogamicin|Drug: ALLR3	Phase 2
NCT05313243	Pembrolizumab and Brentuximab Vedotin in Subjects With Relapsed/Refractory T-cell Lymphoma	T-Cell Lymphoma	Drug: Brentuximab vedotin|Drug: Pembrolizumab	Phase 2
NCT04561206	Brentuximab Vedotin and Nivolumab for the Treatment of Patients With Relapsed Classical Hodgkin Lymphoma	Recurrent Classic Hodgkin Lymphoma	Drug: Brentuximab Vedotin|Biological: Nivolumab	Phase 2
NCT04479267	Polatuzumab Vedotin and Combination Chemotherapy for the Treatment of Previously Untreated Lymphoma	Diffuse Large B-Cell Lymphoma|High Grade B-Cell Lymphoma w/MYC & BCL2 or BCL6 Rearrangements|High Grade B-Cell Lymphoma w/MYC, BCL2 & BCL6 Rearrangements|Double Expressor Lymphoma|High-grade B-cell Lymphoma	Drug: Prednisone|Drug: Prednisolone|Drug: Methylprednisolone|Biological: Rituximab|Drug: Polatuzumab Vedotin|Drug: Cyclophosphamide|Drug: Doxorubicin Hydrochloride	Phase 2
NCT04587687	Brentuximab Vedotin and Bendamustine for the Treatment of Relapsed or Refractory Follicular Lymphoma	Recurrent Follicular Lymphoma|Refractory Follicular Lymphoma	Drug: Bendamustine Hydrochloride|Drug: Brentuximab Vedotin	Phase 2
NCT05169658	Mosunetuzumab With or Without Polatuzumab Vedotin and Obinutuzumab for the Treatment of Untreated Indolent B-Cell Non-Hodgkin Lymphoma	Non-Hodgkin Lymphoma|Grade 1 Follicular Lymphoma|Grade 2 Follicular Lymphoma|Grade 3a Follicular Lymphoma|Indolent B-Cell Non-Hodgkin Lymphoma|Marginal Zone Lymphoma|Recurrent Extranodal Marginal Zone Lymphoma of Mucosa-Associated Lymphoid Tissue|Refractory Extranodal Marginal Zone Lymphoma of Mucosa-Associated Lymphoid Tissue	Biological: Mosunetuzumab|Biological: Obinutuzumab|Drug: Polatuzumab Vedotin	Phase 2
NCT05673785	A Study of Brentuximab Vedotin in Combination With Cyclophosphamide, Doxorubicin (Hydroxydaunorubicin), Prednisone (CHP) in Chinese Participants With CD30-Positive (CD30+) Peripheral T-Cell Lymphomas (PTCL)	Lymphoma	Drug: Brentuximab Vedotin|Drug: Cyclophosphamide|Drug: Doxorubicin|Drug: Prednisone	Phase 2
NCT05039073	Brentuximab Vedotin and Nivolumab for the Treatment of Relapsed/Refractory Classic Hodgkin Lymphoma Previously Treated With Brentuximab Vedotin or Checkpoint Inhibitors	Recurrent Classic Hodgkin Lymphoma|Refractory Classic Hodgkin Lymphoma	Drug: Brentuximab Vedotin|Procedure: Hematopoietic Cell Transplantation|Biological: Nivolumab|Other: Quality-of-Life Assessment|Other: Questionnaire Administration	Phase 2
NCT04659044	Polatuzumab Vedotin, Venetoclax, and Rituximab and Hyaluronidase Human for the Treatment of Relapsed or Refractory Mantle Cell Lymphoma	Recurrent B-Cell Non-Hodgkin Lymphoma|Recurrent Grade 1 Follicular Lymphoma|Recurrent Grade 2 Follicular Lymphoma|Recurrent Grade 3a Follicular Lymphoma|Recurrent Mantle Cell Lymphoma|Recurrent Marginal Zone Lymphoma|Recurrent Small Lymphocytic Lymphoma|Refractory B-Cell Non-Hodgkin Lymphoma|Refractory Grade 1 Follicular Lymphoma|Refractory Grade 2 Follicular Lymphoma|Refractory Grade 3a Follicul…	Drug: Polatuzumab Vedotin|Biological: Rituximab|Biological: Rituximab and Hyaluronidase Human|Drug: Venetoclax	Phase 2
NCT05633615	Testing Drug Treatments After CAR T-cell Therapy in Patients With Relapsed/Refractory Diffuse Large B-cell Lymphoma	Diffuse Large B-Cell Lymphoma|Grade 3b Follicular Lymphoma|Primary Mediastinal (Thymic) Large B-Cell Lymphoma|Recurrent Diffuse Large B-Cell Lymphoma|Refractory Diffuse Large B-Cell Lymphoma|Transformed Follic Lymph to Diff Large B-Cell Lymphoma|Transformed Marg Zone Lymph to Diff Large B-Cell Lymphoma	Biological: Axicabtagene Ciloleucel|Procedure: Biospecimen Collection|Procedure: Computed Tomography|Drug: Cyclophosphamide|Drug: Fludarabine|Biological: Lisocabtagene Maraleucel|Biological: Mosunetuzumab|Other: Patient Observation|Drug: Polatuzumab Vedotin|Procedure: Positron Emission Tomography|Biological: Tisagenlecleucel	Phase 2
NCT04745949	PACIFIC: Primary Mediastinal Large B-cell Lymphoma Treated With Antibody Therapy, Checkpoint Inhibitor in Frontline With ImmunoChemotherapy	Ann Arbor Stage I Primary Mediastinal (Thymic) Large B-Cell Lymphoma|Ann Arbor Stage II Primary Mediastinal (Thymic) Large B-Cell Lymphoma|Ann Arbor Stage III Primary Mediastinal (Thymic) Large B-Cell Lymphoma|Ann Arbor Stage IV Primary Mediastinal (Thymic) Large B-Cell Lymphoma	Drug: Brentuximab Vedotin|Drug: Cyclophosphamide|Drug: Doxorubicin|Biological: Nivolumab|Drug: Prednisone|Other: Quality-of-Life Assessment|Biological: Rituximab	Phase 2
NCT04606914	Study of Carboplatin and Mirvetuximab Soravtansine in First-Line Treatment of Patients Receiving Neoadjuvant Chemotherapy With Advanced-Stage Ovarian, Fallopian Tube or Primary Peritoneal Cancer	Ovarian Cancer|Fallopian Tube|Primary Peritoneal Cancer	Drug: mirvetuximab soravtansine (MIRV	Phase 2
NCT04924699	A Study of MRG002 in the Treatment of Patients With HER2-positive Unresectable Locally Advanced or Metastatic Breast Cancer	Advanced Breast Cancer|Metastatic Breast Cancer	Drug: MRG002|Drug: Trastuzumab Emtansine for Injection	Phase 2|Phase 3
NCT05426486	A Study of ARX788 Combined With Pyrotinib Maleate Versus TCBHP (Trastuzumab Plus Pertuzumab With Docetaxel and Carboplatin) as Neoadjuvant Treatment in HER2-positive Breast Cancer Patients	HER2-positive Breast Cancer	Drug: ARX788|Drug: Pyrotinib maleate|Drug: Trastuzumab|Drug: Pertuzumab|Drug: Docetaxel|Drug: Carboplatin	Phase 2|Phase 3
NCT04595565	Sacituzumab Govitecan in Primary HER2-negative Breast Cancer	HER2-negative Breast Cancer|Triple Negative Breast Cancer	Drug: Capecitabine|Drug: Carboplatin|Drug: Cisplatin|Drug: Sacituzumab govitecan	Phase 3
NCT05622890	A Single-arm Clinical Trial of IMGN853 in Chinese Adult Patients With Platinum-resistant, Epithelial Ovarian Cancer	Epithelial Ovarian Cancer|Peritoneal Cancer|Fallopian Tube Cancer	Drug: Mirvetuximab Soravtansine	Phase 3
NCT05904964	Disitamab Vedotin (RC48) in Hormone Receptor Positive, HER2-low Metastatic Breast Cancer (the Rosy Trial)	HR Positive/HER2 Low Expression Metastatic Breast Cancer	Drug: Disitamab vedotin|Other: Endocrine therapy	Phase 3
NCT05754853	A Study of MRG002 Versus Investigator's Choice of Chemotherapy in the Treatment of Patients With HER2-positive Unresectable Advanced or Metastatic Urothelial Cancer	Advanced or Metastatic Urothelium Cancer	Drug: MRG002|Drug: Docetaxel Injection|Drug: Paclitaxel Injection|Drug: Gemcitabine Hydrochloride for Injection|Drug: Pemetrexed Disodium Injection	Phase 3
NCT05629585	A Study of Dato-DXd With or Without Durvalumab Versus Investigator's Choice of Therapy in Patients With Stage I-III Triple-negative Breast Cancer Without Pathological Complete Response Following Neoadjuvant Therapy (TROPION-Breast03)	Breast Cancer	Drug: Dato-DXd|Drug: Durvalumab|Drug: Capecitabine|Drug: Pembrolizumab	Phase 3
NCT05374512	A Study of Dato-DXd Versus Investigator's Choice Chemotherapy in Patients With Locally Recurrent Inoperable or Metastatic Triple-negative Breast Cancer, Who Are Not Candidates for PD-1/PD-L1 Inhibitor Therapy (TROPION-Breast02)	Breast Cancer	Drug: Dato-DXd|Drug: Paclitaxel|Drug: Nab-paclitaxel|Drug: Carboplatin|Drug: Capecitabine|Drug: Eribulin mesylate	Phase 3
NCT05445778	Mirvetuximab Soravtansine With Bevacizumab Versus Bevacizumab as Maintenance in Platinum-sensitive Ovarian, Fallopian Tube, or Peritoneal Cancer (GLORIOSA)	Ovarian Cancer|Peritoneal Cancer|Fallopian Tube Cancer	Drug: Mirvetuximab soravtansine plus Bevacizumab|Drug: Bevacizumab	Phase 3
NCT05675410	A Study to Compare Standard Therapy to Treat Hodgkin Lymphoma to the Use of Two Drugs, Brentuximab Vedotin and Nivolumab	Lugano Classification Limited Stage Hodgkin Lymphoma AJCC v8	Procedure: Biospecimen Collection|Biological: Bleomycin Sulfate|Drug: Brentuximab Vedotin|Procedure: Computed Tomography|Drug: Cyclophosphamide|Drug: Dacarbazine|Drug: Doxorubicin Hydrochloride|Drug: Etoposide|Drug: Etoposide Phosphate|Other: Fludeoxyglucose F-18|Radiation: Involved-site Radiation Therapy|Procedure: Magnetic Resonance Imaging|Biological: Nivolumab|Procedure: Positron Emission Tom…	Phase 3
NCT05609968	Study of Pembrolizumab (MK-3475) Monotherapy Versus Sacituzumab Govitecan in Combination With Pembrolizumab for Participants With Metastatic Non-small Cell Lung Cancer (NSCLC) With Programmed Cell Death Ligand 1 (PD-L1) Tumor Proportion Score (TPS) ‚â•50% (MK-3475-D46)	Carcinoma, Non-Small-Cell Lung	Biological: Sacituzumab Govitecan|Biological: Pembrolizumab	Phase 3
NCT05687266	Study of Datopotamab Deruxtecan (Dato-DXd) in Combination With Durvalumab and Carboplatin for First-Line Treatment of Patients With Advanced NSCLC Without Actionable Genomic Alterations	NSCLC	Drug: Datopotamab deruxtecan|Drug: Durvalumab|Drug: Carboplatin|Drug: Pembrolizumab|Drug: Cisplatin|Drug: Pemetrexed|Drug: Paclitaxel	Phase 3
	Supplementary table 1: Recruiting clinical trials present on ClinicalTrials.gov searching the keywords “cancer” and “antibody-drug conjugate”. The research has been done adding the filter “recruiting”. The research has been performed on August 28th, 2023.
